# Supplementary material for: DNA methylation patterns from peripheral blood separate coronary artery disease patients with and without heart failure
Source: PubMed Central journal article supplement — ESC Heart Fail. 2020 Jul 2;7(5):2468–78. doi: 10.1002/ehf2.12810 (PMC7524212; doi:10.1002/ehf2.12810), 2020-07-02
Supplement: EHF2-7-2468-s003.pdf [file EHF2-7-2468-s003.pdf]

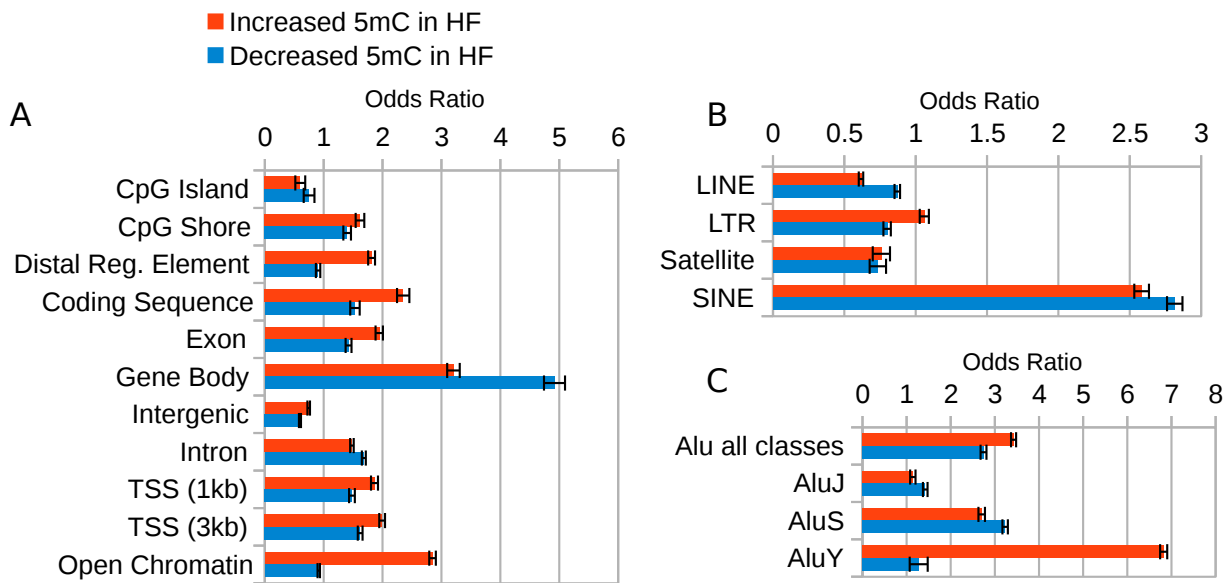

Figure S1. Differential methylation enriched in genomic compartments. Regions with differential methylation (nom p-val<0.01) were intersected with various annotated functional compartments (A), major repeat element classes (B), and Alu subclasses (C).
